# Supplementary material
Source: Springer Nature journal article supplement (https://www.springermedizin.de/resource/supplementary/13013_2010_322_MOESM1_ESM.pdf/9631624)

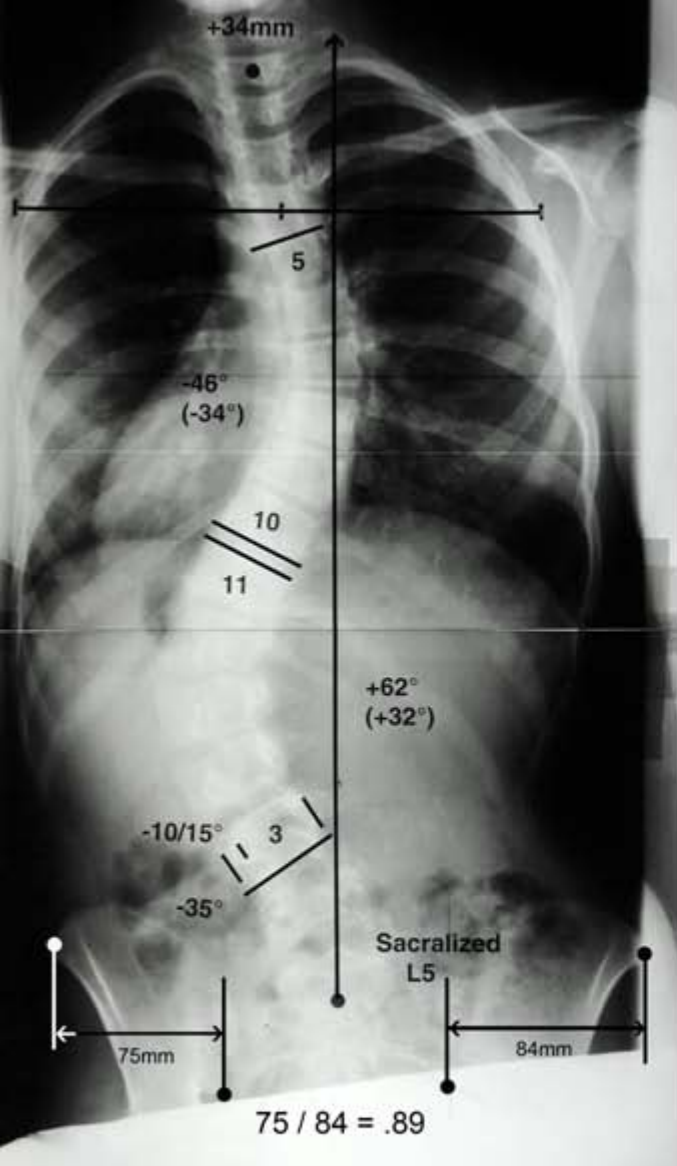

1A

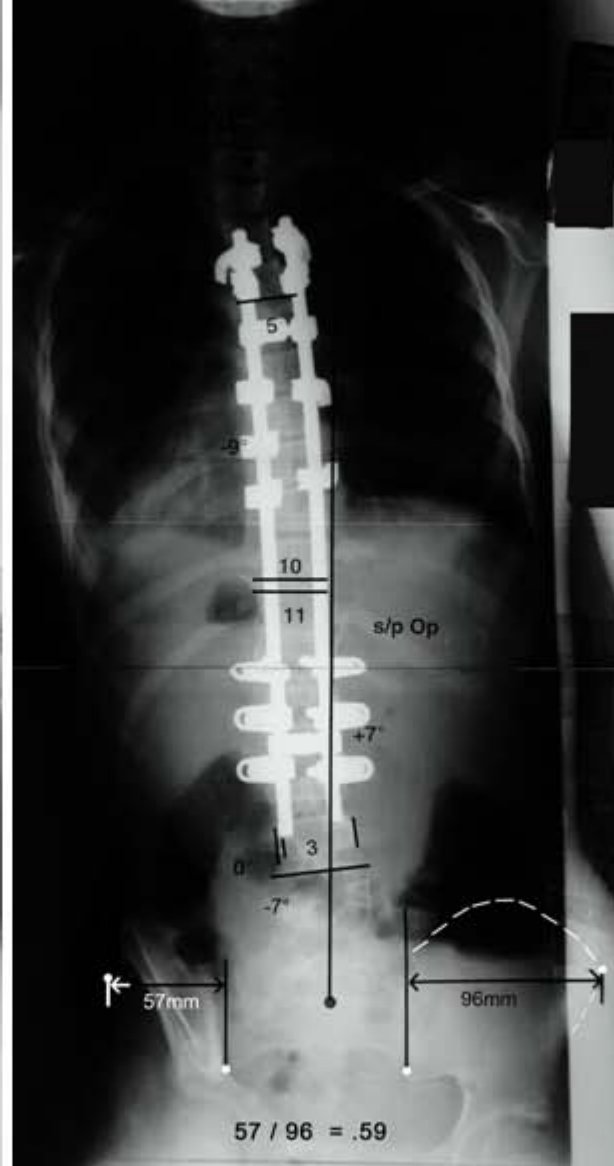

1B

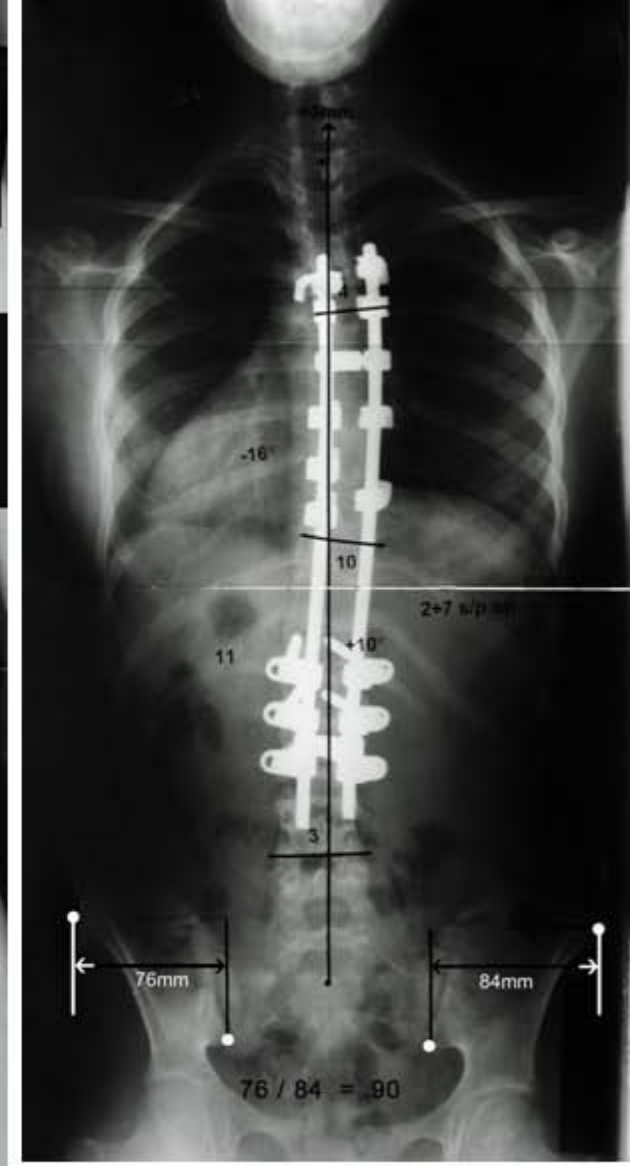

1C

Supplement: MOESM1 [file 9631624]
